# Supplementary material for: Microstructure Evolution, Constitutive Modelling, and Superplastic Forming of Experimental 6XXX-Type Alloys Processed with Different Thermomechanical Treatments
Source: MDPI journal article supplement (doi:10.3390/ma16010445), 2023-01-03
Supplement: s1 [file s1]

## Supplementary Materials:

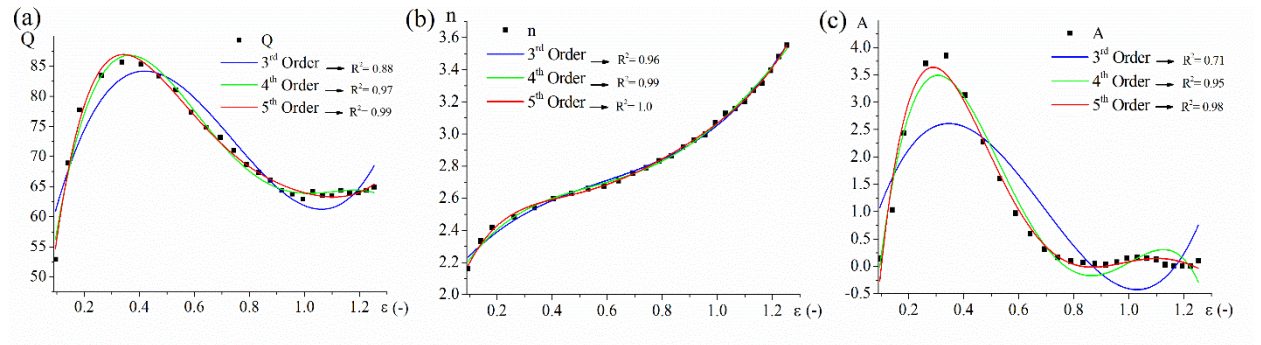

**Figure S1.** The material constants,  $Q$ ,  $n$ ,  $A$ , dependance on the strain of the investigated alloy at studied range of strain rate and temperature. It is noted that, in this work, the polynomial of degree 5 provides minimum level of errors, the higher order, as 6, insignificantly decreases the errors while increases the number of constants (correct to 1.0)

**Table S1.** Constants for Equation 8.

| Parameter | Y0    | B1     | B2       | B3      | B4       | B5     | Adj. R-Square |
|-----------|-------|--------|----------|---------|----------|--------|---------------|
| $Q$       | 11.23 | 598.95 | -1681.20 | 2072.93 | -1222.08 | 284.17 | 0.99          |
| $n$       | 1.74  | 6.10   | -17.93   | 26.55   | -18.37   | 4.98   | 1.0           |
| $A$       | -7.08 | 96.77  | -301.30  | 389.33  | -227.02  | 49.39  | 0.98          |

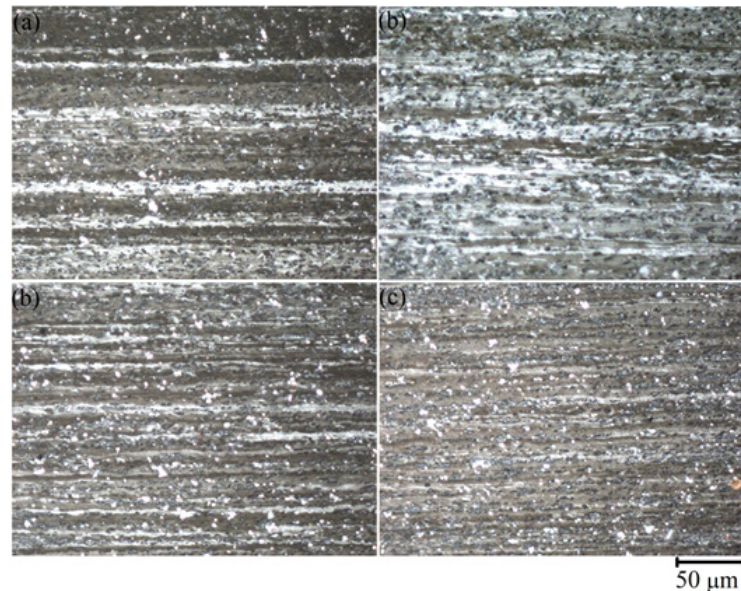

**Figure S2.** The grain structure of the mechanically treated samples in (a) 1HR, (b) 2HR, (c) CR50, and (d) CR80 regimes and annealed at 480 °C for 20 min (OM).
